# Supplementary material
Source: PubMed Central journal article supplement (PMC2566077)
Supplement: supp_46_10_3429__1.pdf [file supp_46_10_3429__1.pdf]

Supplemental Data Table 1. Negative Ion ESI-MS data and proposed compositions for intact *C. jejuni* LOS. Strains from patients who developed GBS are designated with GB prefixes (GBXX). Strains from patients who developed MFS are designated with MF prefixes (MFXX). Strains from control patients with enteritis only are designated with numbers without prefixes (XX).

| Strain         | Molecular mass<br>[Da] |                      | Molecular mass<br>[Da] |            | Proposed composition                                                                                                                                                 | LOS class |
|----------------|------------------------|----------------------|------------------------|------------|----------------------------------------------------------------------------------------------------------------------------------------------------------------------|-----------|
|                | [M-4H] <sup>+</sup>    | [M-3H] <sup>3-</sup> | Observed               | Calculated |                                                                                                                                                                      |           |
| <b>GB1</b>     | 940.2                  | 1253.5               | 3761.2                 | 3762.9     | Hex <sub>5</sub> •Hep <sub>2</sub> •PEtn <sub>1</sub> •KDO <sub>2</sub> •lipid A ( <i>PEtn, P</i> )                                                                  | <b>C</b>  |
|                |                        | 1272.2               | 3819.6                 | 3820.0     | Gly•Hex <sub>5</sub> •Hep <sub>2</sub> •PEtn <sub>1</sub> •KDO <sub>2</sub> •lipid A ( <i>PEtn, P</i> )                                                              |           |
|                | 970.3                  | 1294.3               | 3885.6                 | 3886.0     | Hex <sub>5</sub> •Hep <sub>2</sub> •PEtn <sub>1</sub> •KDO <sub>2</sub> •lipid A ( <i>PEtn, PEtn</i> )                                                               |           |
|                |                        | 1313.4               | 3943.2                 | 3943.0     | Gly•Hex <sub>5</sub> •Hep <sub>2</sub> •PEtn <sub>1</sub> •KDO <sub>2</sub> •lipid A ( <i>PEtn, PEtn</i> )                                                           |           |
| <b>GB4, 86</b> |                        | 1346.7               | 4043.1                 | 4043.7     | QuiNAC <sub>1</sub> •Hex <sub>2</sub> •HexNAC <sub>3</sub> •Hep <sub>2</sub> •PNMe <sub>1</sub> •PEtn <sub>1</sub> •KDO <sub>2</sub> •lipid A ( <i>P, P</i> )        | <b>P</b>  |
|                | 1050.1                 | 1401.1               | 4205.4                 | 4205.9     | QuiNAC <sub>1</sub> •Hex <sub>3</sub> •HexNAC <sub>3</sub> •Hep <sub>2</sub> •PNMe <sub>1</sub> •PEtn <sub>1</sub> •KDO <sub>2</sub> •lipid A ( <i>P, P</i> )        |           |
|                |                        | 1419.9               | 4262.7                 | 4262.9     | Gly•QuiNAC <sub>1</sub> •Hex <sub>3</sub> •HexNAC <sub>3</sub> •Hep <sub>2</sub> •PNMe <sub>1</sub> •PEtn <sub>1</sub> •KDO <sub>2</sub> •lipid A ( <i>P, P</i> )    |           |
|                | 1081.4                 | 1441.9               | 4329.2                 | 4328.9     | QuiNAC <sub>1</sub> •Hex <sub>3</sub> •HexNAC <sub>3</sub> •Hep <sub>2</sub> •PNMe <sub>1</sub> •PEtn <sub>1</sub> •KDO <sub>2</sub> •lipid A ( <i>PEtn, P</i> )     |           |
|                |                        | 1460.8               | 4385.4                 | 4386.0     | Gly•QuiNAC <sub>1</sub> •Hex <sub>3</sub> •HexNAC <sub>3</sub> •Hep <sub>2</sub> •PNMe <sub>1</sub> •PEtn <sub>1</sub> •KDO <sub>2</sub> •lipid A ( <i>PEtn, P</i> ) |           |
| <b>GB5</b>     |                        | 1213.1               | 3642.3                 | 3641.8     | HexNAC <sub>1</sub> •Hex <sub>3</sub> •Hep <sub>2</sub> •PEtn <sub>1</sub> •KDO <sub>2</sub> •lipid A ( <i>PEtn, P</i> )                                             | <b>B</b>  |
|                |                        | 1232.0               | 3699.0                 | 3698.9     | Gly•HexNAC <sub>1</sub> •Hex <sub>3</sub> •Hep <sub>2</sub> •PEtn <sub>1</sub> •KDO <sub>2</sub> •lipid A ( <i>PEtn, P</i> )                                         |           |
|                |                        | 1254.5               | 3766.5                 | 3764.9     | HexNAC <sub>1</sub> •Hex <sub>3</sub> •Hep <sub>2</sub> •PEtn <sub>1</sub> •KDO <sub>2</sub> •lipid A ( <i>PEtn, PEtn</i> )                                          |           |
|                |                        | 1273.2               | 3822.6                 | 3821.9     | Gly•HexNAC <sub>1</sub> •Hex <sub>3</sub> •Hep <sub>2</sub> •PEtn <sub>1</sub> •KDO <sub>2</sub> •lipid A ( <i>PEtn, PEtn</i> )                                      |           |
| <b>GB30</b>    |                        | 1391.3               | 4176.9                 | 4178.2     | Ac•Neu5Ac <sub>1</sub> •HexNAC <sub>1</sub> •Hex <sub>3</sub> •Hep <sub>2</sub> •P <sub>1</sub> •PEtn <sub>1</sub> •KDO <sub>2</sub> •lipid A ( <i>PEtn, PEtn</i> )  | <b>B</b>  |

|                                         |        |        |        |        |                                                                                                                                                                  |          |
|-----------------------------------------|--------|--------|--------|--------|------------------------------------------------------------------------------------------------------------------------------------------------------------------|----------|
|                                         | 1116.2 | 1488.5 | 4468.7 | 4469.4 | Ac•Neu5Ac <sub>2</sub> •HexNAc <sub>1</sub> •Hex <sub>3</sub> •Hep <sub>2</sub> •P <sub>1</sub> •PEtn <sub>1</sub> •KDO <sub>2</sub> •lipid A (PPEtn, PPEtn)     |          |
|                                         |        | 1507.0 | 4524.0 | 4526.5 | Gly•Ac•Neu5Ac <sub>2</sub> •HexNAc <sub>1</sub> •Hex <sub>3</sub> •Hep <sub>2</sub> •P <sub>1</sub> •PEtn <sub>1</sub> •KDO <sub>2</sub> •lipid A (PPEtn, PPEtn) |          |
|                                         | 1146.9 | 1529.4 | 4591.4 | 4492.5 | Ac•Neu5Ac <sub>2</sub> •HexNAc <sub>1</sub> •Hex <sub>3</sub> •Hep <sub>2</sub> •P <sub>1</sub> •PEtn <sub>2</sub> •KDO <sub>2</sub> •lipid A (PPEtn, PPEtn)     |          |
| <b>GB24</b>                             |        | 1428.6 | 4288.8 | 4290.4 | Hex <sub>7</sub> •HexNAc <sub>1</sub> •Hep <sub>2</sub> •PEtn <sub>1</sub> •KDO <sub>2</sub> •lipid A (PPEtn, P)                                                 | <b>K</b> |
|                                         |        | 1447.1 | 4344.3 | 4347.4 | Gly•Hex <sub>7</sub> •HexNAc <sub>1</sub> •Hep <sub>2</sub> •PEtn <sub>1</sub> •KDO <sub>2</sub> •lipid A (PPEtn, P)                                             |          |
|                                         |        | 1469.7 | 4412.1 | 4413.4 | Hex <sub>7</sub> •HexNAc <sub>1</sub> •Hep <sub>2</sub> •PEtn <sub>1</sub> •KDO <sub>2</sub> •lipid A (PPEtn, PPEtn)                                             |          |
|                                         |        | 1488.1 | 4467.3 | 4470.5 | Gly•Hex <sub>7</sub> •HexNAc <sub>1</sub> •Hep <sub>2</sub> •PEtn <sub>1</sub> •KDO <sub>2</sub> •lipid A (PPEtn, PPEtn)                                         |          |
| <b>MF8</b>                              |        | 1242.1 | 3729.3 | 3729.9 | Neu5Ac <sub>1</sub> •Hex <sub>3</sub> •Hep <sub>2</sub> •PEtn <sub>1</sub> •KDO <sub>2</sub> •lipid A (PPEtn, P)                                                 | <b>B</b> |
|                                         |        | 1283.1 | 3852.3 | 3853.0 | Neu5Ac <sub>1</sub> •Hex <sub>3</sub> •Hep <sub>2</sub> •PEtn <sub>1</sub> •KDO <sub>2</sub> •lipid A (PPEtn, PPEtn)                                             |          |
|                                         |        | 1310.0 | 3933.0 | 3933.1 | Neu5Ac <sub>1</sub> •Hex <sub>3</sub> •HexNAc <sub>1</sub> •Hep <sub>2</sub> •PEtn <sub>1</sub> •KDO <sub>2</sub> •lipid A (PPEtn, P)                            |          |
|                                         |        | 1339.1 | 4020.3 | 4021.2 | Neu5Ac <sub>2</sub> •Hex <sub>3</sub> •Hep <sub>2</sub> •PEtn <sub>1</sub> •KDO <sub>2</sub> •lipid A (PPEtn, P)                                                 |          |
|                                         |        | 1351.1 | 4056.3 | 4056.1 | Neu5Ac <sub>1</sub> •Hex <sub>3</sub> •HexNAc <sub>1</sub> •Hep <sub>2</sub> •PEtn <sub>1</sub> •KDO <sub>2</sub> •lipid A (PPEtn, PPEtn)                        |          |
|                                         |        | 1380.4 | 4144.2 | 4144.2 | Neu5Ac <sub>2</sub> •Hex <sub>3</sub> •Hep <sub>2</sub> •PEtn <sub>1</sub> •KDO <sub>2</sub> •lipid A (PPEtn, PPEtn)                                             |          |
| <b>GB13, GB14, 19, 49, 71, 109, 110</b> |        | 1418.4 | 4258.2 | 4257.4 | Neu5Ac <sub>1</sub> •Hex <sub>5</sub> •HexNAc <sub>1</sub> •Hep <sub>2</sub> •PEtn <sub>1</sub> •KDO <sub>2</sub> •lipid A (PPEtn, P)                            | <b>C</b> |
|                                         | 1104.0 | 1472.4 | 4420.1 | 4419.5 | Neu5Ac <sub>1</sub> •Hex <sub>6</sub> •HexNAc <sub>1</sub> •Hep <sub>2</sub> •PEtn <sub>1</sub> •KDO <sub>2</sub> •lipid A (PPEtn, P)                            |          |
|                                         |        | 1491.3 | 4476.9 | 4476.6 | Gly•Neu5Ac <sub>1</sub> •Hex <sub>6</sub> •HexNAc <sub>1</sub> •Hep <sub>2</sub> •PEtn <sub>1</sub> •KDO <sub>2</sub> •lipid A (PPEtn, P)                        |          |
|                                         | 1134.8 | 1513.2 | 4542.9 | 4542.6 | Neu5Ac <sub>1</sub> •Hex <sub>6</sub> •HexNAc <sub>1</sub> •Hep <sub>2</sub> •PEtn <sub>1</sub> •KDO <sub>2</sub> •lipid A (PPEtn, PPEtn)                        |          |
|                                         |        | 1532.4 | 4600.2 | 4599.6 | Gly•Neu5Ac <sub>1</sub> •Hex <sub>6</sub> •HexNAc <sub>1</sub> •Hep <sub>2</sub> •PEtn <sub>1</sub> •KDO <sub>2</sub> •lipid A (PPEtn, PPEtn)                    |          |
| <b>3</b>                                |        | 1381.9 | 4148.7 |        | Unknown, no sialic acid                                                                                                                                          | <b>D</b> |
|                                         |        | 1423.4 | 4273.2 |        | Unknown, no sialic acid                                                                                                                                          |          |
| <b>6</b>                                |        | 1310.0 | 3933.0 | 3933.1 | Neu5Ac <sub>1</sub> •Hex <sub>3</sub> •HexNAc <sub>1</sub> •Hep <sub>2</sub> •PEtn <sub>1</sub> •KDO <sub>2</sub> •lipid A (PPEtn, P)                            | <b>A</b> |

|                               |        |        |        |        |                                                                                                                                                               |          |
|-------------------------------|--------|--------|--------|--------|---------------------------------------------------------------------------------------------------------------------------------------------------------------|----------|
|                               |        | 1351.5 | 4057.5 | 4056.1 | Neu5Ac <sub>1</sub> •Hex <sub>3</sub> •HexNac <sub>1</sub> •Hep <sub>2</sub> •PEtn <sub>1</sub> •KDO <sub>2</sub> •lipid A (PPEtn, PPEtn)                     |          |
| <b>8</b>                      |        | 1449.9 | 4352.7 |        | Unknown, no sialic acid                                                                                                                                       | <b>E</b> |
|                               |        | 1468.5 | 4408.5 |        | Unknown, with glycine, no sialic acid                                                                                                                         |          |
|                               |        | 1491.0 | 4476.0 |        | Unknown, no sialic acid                                                                                                                                       |          |
|                               |        | 1510.3 | 4533.9 |        | Unknown, with glycine, no sialic acid                                                                                                                         |          |
| <b>21</b>                     | 1032.1 | 1376.3 | 4132.2 | 4134.3 | Neu5Ac <sub>1</sub> •Hex <sub>5</sub> •HexNac <sub>1</sub> •Hep <sub>2</sub> •KDO <sub>2</sub> •lipid A (PPEtn, P)                                            | <b>C</b> |
|                               | 1046.1 |        | 4188.4 | 4191.4 | Gly•Neu5Ac <sub>1</sub> •Hex <sub>5</sub> •HexNac <sub>1</sub> •Hep <sub>2</sub> •KDO <sub>2</sub> •lipid A (PPEtn, P)                                        |          |
|                               | 1063.6 | 1418.2 | 4258.0 | 4257.4 | Neu5Ac <sub>1</sub> •Hex <sub>5</sub> •HexNac <sub>1</sub> •Hep <sub>2</sub> •PEtn <sub>1</sub> •KDO <sub>2</sub> •lipid A (PPEtn, P)                         |          |
|                               | 1077.9 | 1437.3 | 4315.3 | 4314.4 | Gly•Neu5Ac <sub>1</sub> •Hex <sub>5</sub> •HexNac <sub>1</sub> •Hep <sub>2</sub> •PEtn <sub>1</sub> •KDO <sub>2</sub> •lipid A (PPEtn, P)                     |          |
|                               | 1094.5 | 1459.4 | 4381.6 | 4380.4 | Neu5Ac <sub>1</sub> •Hex <sub>5</sub> •HexNac <sub>1</sub> •Hep <sub>2</sub> •PEtn <sub>1</sub> •KDO <sub>2</sub> •lipid A (PPEtn, PPEtn)                     |          |
|                               | 1108.6 | 1478.3 | 4438.2 | 4437.5 | Gly•Neu5Ac <sub>1</sub> •Hex <sub>5</sub> •HexNac <sub>1</sub> •Hep <sub>2</sub> •PEtn <sub>1</sub> •KDO <sub>2</sub> •lipid A (PPEtn, PPEtn)                 |          |
| <b>39</b>                     |        | 1433.3 | 4302.9 | 4304.3 | Neu5Ac <sub>2</sub> •Hex <sub>3</sub> •HexNac <sub>1</sub> •Hep <sub>2</sub> •P <sub>1</sub> •PEtn <sub>1</sub> •KDO <sub>2</sub> •lipid A (PPEtn, P)         | <b>-</b> |
|                               |        | 1474.8 | 4427.4 | 4427.4 | Neu5Ac <sub>2</sub> •Hex <sub>3</sub> •HexNac <sub>1</sub> •Hep <sub>2</sub> •P <sub>1</sub> •PEtn <sub>1</sub> •KDO <sub>2</sub> •lipid A (PPEtn, PPEtn)     |          |
|                               |        | 1493.8 | 4484.4 | 4484.4 | Gly•Neu5Ac <sub>2</sub> •Hex <sub>3</sub> •HexNac <sub>1</sub> •Hep <sub>2</sub> •P <sub>1</sub> •PEtn <sub>1</sub> •KDO <sub>2</sub> •lipid A (PPEtn, PPEtn) |          |
| <b>GB23, 118</b>              |        | 1159.3 | 3480.9 | 3479.7 | Hex <sub>2</sub> •HexNac <sub>1</sub> •Hep <sub>2</sub> •PEtn <sub>1</sub> •KDO <sub>2</sub> •lipid A (PPEtn, P)                                              | <b>A</b> |
|                               | 942.0  | 1256.2 | 3771.1 | 3771.0 | Neu5Ac <sub>1</sub> •Hex <sub>2</sub> •HexNac <sub>1</sub> •Hep <sub>2</sub> •PEtn <sub>1</sub> •KDO <sub>2</sub> •lipid A (PPEtn, P)                         |          |
|                               |        | 1275.2 | 3828.6 | 3828.0 | Gly•Neu5Ac <sub>1</sub> •Hex <sub>2</sub> •HexNac <sub>1</sub> •Hep <sub>2</sub> •PEtn <sub>1</sub> •KDO <sub>2</sub> •lipid A (PPEtn, P)                     |          |
|                               | 972.5  | 1297.2 | 3894.6 | 3894.0 | Neu5Ac <sub>1</sub> •Hex <sub>2</sub> •HexNac <sub>1</sub> •Hep <sub>2</sub> •PEtn <sub>1</sub> •KDO <sub>2</sub> •lipid A (PPEtn, PPEtn)                     |          |
|                               | 987.0  | 1316.2 | 3951.8 | 3951.1 | Gly•Neu5Ac <sub>1</sub> •Hex <sub>2</sub> •HexNac <sub>1</sub> •Hep <sub>2</sub> •PEtn <sub>1</sub> •KDO <sub>2</sub> •lipid A (PPEtn, PPEtn)                 |          |
| <b>GB25, 18, 94, 127, 129</b> | 1023.0 | 1364.2 | 4095.8 | 4095.2 | Neu5Ac <sub>1</sub> •Hex <sub>4</sub> •HexNac <sub>1</sub> •Hep <sub>2</sub> •PEtn <sub>1</sub> •KDO <sub>2</sub> •lipid A (PPEtn, P)                         | <b>B</b> |
|                               |        | 1054.0 | 1405.3 | 4217.5 | 4218.3                                                                                                                                                        |          |

|                                                                      |        |        |        |        |                                                                                                                                               |          |
|----------------------------------------------------------------------|--------|--------|--------|--------|-----------------------------------------------------------------------------------------------------------------------------------------------|----------|
|                                                                      | 1095.8 | 1461.3 | 4587.1 | 4386.5 | Neu5Ac <sub>2</sub> •Hex <sub>4</sub> •HexNac <sub>1</sub> •Hep <sub>2</sub> •PEtn <sub>1</sub> •KDO <sub>2</sub> •lipid A (PPEtn, P)         |          |
|                                                                      | 1110.4 | 1480.9 | 4445.7 | 4443.5 | Gly•Neu5Ac <sub>2</sub> •Hex <sub>4</sub> •HexNac <sub>1</sub> •Hep <sub>2</sub> •PEtn <sub>1</sub> •KDO <sub>2</sub> •lipid A (PPEtn, P)     |          |
|                                                                      | 1126.7 | 1502.8 | 4511.1 | 4509.5 | Neu5Ac <sub>2</sub> •Hex <sub>4</sub> •HexNac <sub>1</sub> •Hep <sub>2</sub> •PEtn <sub>1</sub> •KDO <sub>2</sub> •lipid A (PPEtn, PPEtn)     |          |
|                                                                      | 1140.8 | 1521.8 | 4567.8 | 4566.6 | Gly•Neu5Ac <sub>2</sub> •Hex <sub>4</sub> •HexNac <sub>1</sub> •Hep <sub>2</sub> •PEtn <sub>1</sub> •KDO <sub>2</sub> •lipid A (PPEtn, PPEtn) |          |
| <b>GB15</b>                                                          | 960.0  | 1280.1 | 3843.7 | 3843.1 | Hex <sub>5</sub> •HexNac <sub>1</sub> •Hep <sub>2</sub> •KDO <sub>2</sub> •lipid A (PPEtn, P)                                                 | <b>F</b> |
|                                                                      |        | 1299.3 | 3900.9 | 3900.1 | Gly•Hex <sub>5</sub> •HexNac <sub>1</sub> •Hep <sub>2</sub> •KDO <sub>2</sub> •lipid A (PPEtn, P)                                             |          |
|                                                                      |        | 1321.3 | 3966.9 | 3966.1 | Hex <sub>5</sub> •HexNac <sub>1</sub> •Hep <sub>2</sub> •KDO <sub>2</sub> •lipid A (PPEtn, PPEtn)                                             |          |
|                                                                      |        | 1340.1 | 4023.3 | 4023.2 | Gly•Hex <sub>5</sub> •HexNac <sub>1</sub> •Hep <sub>2</sub> •KDO <sub>2</sub> •lipid A (PPEtn, PPEtn)                                         |          |
| <b>GB2, GB3, GB11, GB18, GB21, GB22, GB31, 9, 12, 13, 23, 31, 41</b> | 982.3  | 1310.1 | 3933.3 | 3933.1 | Neu5Ac <sub>1</sub> •Hex <sub>3</sub> •HexNac <sub>1</sub> •Hep <sub>2</sub> •PEtn <sub>1</sub> •KDO <sub>2</sub> •lipid A (PPEtn, P)         | <b>A</b> |
|                                                                      |        | 1350.9 | 4055.7 | 4056.1 | Neu5Ac <sub>1</sub> •Hex <sub>3</sub> •HexNac <sub>1</sub> •Hep <sub>2</sub> •PEtn <sub>1</sub> •KDO <sub>2</sub> •lipid A (PPEtn, PPEtn)     |          |
|                                                                      | 1055.3 | 1406.9 | 4224.5 | 4224.4 | Neu5Ac <sub>2</sub> •Hex <sub>3</sub> •HexNac <sub>1</sub> •Hep <sub>2</sub> •PEtn <sub>1</sub> •KDO <sub>2</sub> •lipid A (PPEtn, P)         |          |
|                                                                      | 1085.8 | 1448.0 | 4377.1 | 4347.4 | Neu5Ac <sub>2</sub> •Hex <sub>3</sub> •HexNac <sub>1</sub> •Hep <sub>2</sub> •PEtn <sub>1</sub> •KDO <sub>2</sub> •lipid A (PPEtn, PPEtn)     |          |
|                                                                      |        | 1467.1 | 4404.3 | 4404.5 | Gly•Neu5Ac <sub>2</sub> •Hex <sub>3</sub> •HexNac <sub>1</sub> •Hep <sub>2</sub> •PEtn <sub>1</sub> •KDO <sub>2</sub> •lipid A (PPEtn, PPEtn) |          |
| <b>GB29</b>                                                          | 982.3  | 1310.2 | 3933.4 | 3933.1 | Neu5Ac <sub>1</sub> •Hex <sub>3</sub> •HexNac <sub>1</sub> •Hep <sub>2</sub> •PEtn <sub>1</sub> •KDO <sub>2</sub> •lipid A (PPEtn, P)         | <b>C</b> |
|                                                                      |        | 1351.4 | 4057.2 | 4056.1 | Neu5Ac <sub>1</sub> •Hex <sub>3</sub> •HexNac <sub>1</sub> •Hep <sub>2</sub> •PEtn <sub>1</sub> •KDO <sub>2</sub> •lipid A (PPEtn, PPEtn)     |          |
|                                                                      | 1055.1 | 1407.5 | 4224.9 | 4224.4 | Neu5Ac <sub>2</sub> •Hex <sub>3</sub> •HexNac <sub>1</sub> •Hep <sub>2</sub> •PEtn <sub>1</sub> •KDO <sub>2</sub> •lipid A (PPEtn, P)         |          |
|                                                                      | 1086.1 | 1448.4 | 4348.3 | 4347.4 | Neu5Ac <sub>2</sub> •Hex <sub>3</sub> •HexNac <sub>1</sub> •Hep <sub>2</sub> •PEtn <sub>1</sub> •KDO <sub>2</sub> •lipid A (PPEtn, PPEtn)     |          |
| <b>GB16, GB19</b>                                                    | 1095.9 | 1461.4 | 4387.4 | 4386.5 | Neu5Ac <sub>2</sub> •Hex <sub>4</sub> •HexNac <sub>1</sub> •Hep <sub>2</sub> •PEtn <sub>1</sub> •KDO <sub>2</sub> •lipid A (PPEtn, P)         | <b>A</b> |
|                                                                      | 1106.3 | 1475.6 | 4429.5 | 4428.5 | Ac•Neu5Ac <sub>2</sub> •Hex <sub>4</sub> •HexNac <sub>1</sub> •Hep <sub>2</sub> •PEtn <sub>1</sub> •KDO <sub>2</sub> •lipid A (PPEtn, P)      |          |
|                                                                      | 1110.0 | 1480.9 | 4444.8 | 4443.5 | Gly•Neu5Ac <sub>2</sub> •Hex <sub>4</sub> •HexNac <sub>1</sub> •Hep <sub>2</sub> •PEtn <sub>1</sub> •KDO <sub>2</sub> •lipid A (PPEtn, P)     |          |
|                                                                      | 1126.6 | 1502.6 | 4511.1 | 4509.5 | Neu5Ac <sub>2</sub> •Hex <sub>4</sub> •HexNac <sub>1</sub> •Hep <sub>2</sub> •PEtn <sub>1</sub> •KDO <sub>2</sub> •lipid A (PPEtn, PPEtn)     |          |

|            |        |        |        |        |                                                                                                                                                           |           |
|------------|--------|--------|--------|--------|-----------------------------------------------------------------------------------------------------------------------------------------------------------|-----------|
|            | 1140.8 | 1521.3 | 4567.8 | 4566.6 | Gly•Neu5Ac <sub>2</sub> •Hex <sub>4</sub> •HexNAc <sub>1</sub> •Hep <sub>2</sub> •PEtn <sub>1</sub> •KDO <sub>2</sub> •lipid A (PPEtn, PPEtn)             |           |
| <b>52</b>  |        | 1350.5 | 4054.5 | 4054.2 | Neu5Ac <sub>1</sub> •Hex <sub>5</sub> •Hep <sub>2</sub> •PEtn <sub>1</sub> •KDO <sub>2</sub> •lipid A (PPEtn, P)                                          | <b>AC</b> |
|            |        | 1391.5 | 4177.5 | 4177.2 | Neu5Ac <sub>1</sub> •Hex <sub>5</sub> •Hep <sub>2</sub> •PEtn <sub>1</sub> •KDO <sub>2</sub> •lipid A (PPEtn, PPEtn)                                      |           |
| <b>78</b>  |        | 1465.2 | 4398.6 |        | Unknown, no sialic acid                                                                                                                                   | <b>E</b>  |
|            |        | 1505.8 | 4520.4 |        | Unknown, no sialic acid                                                                                                                                   |           |
| <b>84</b>  | 1088.8 | 1451.5 | 4358.4 |        | Unknown, no sialic acid                                                                                                                                   | -         |
|            |        | 1492.1 | 4479.3 |        | Unknown, no sialic acid                                                                                                                                   |           |
| <b>81</b>  |        | 1334.3 | 4005.9 | 4005.2 | Hex <sub>6</sub> •Hep <sub>2</sub> •HexNAc <sub>1</sub> •KDO <sub>2</sub> •lipid A (PPEtn, P)                                                             | <b>D</b>  |
|            | 1051.3 | 1401.9 | 4208.9 | 4208.4 | HexNAc <sub>2</sub> •Hex <sub>6</sub> •Hep <sub>2</sub> •KDO <sub>2</sub> •lipid A (PPEtn, P)                                                             |           |
|            |        | 1420.3 | 4263.9 | 4265.5 | Gly•HexNAc <sub>2</sub> •Hex <sub>6</sub> •Hep <sub>2</sub> •KDO <sub>2</sub> •lipid A (PPEtn, P)                                                         |           |
|            | 1081.7 | 1443.1 | 4331.6 | 4331.5 | HexNAc <sub>2</sub> •Hex <sub>6</sub> •Hep <sub>2</sub> •KDO <sub>2</sub> •lipid A (PPEtn, PPEtn)                                                         |           |
|            |        | 1461.5 | 4387.5 | 4388.5 | Gly•HexNAc <sub>2</sub> •Hex <sub>6</sub> •Hep <sub>2</sub> •KDO <sub>2</sub> •lipid A (PPEtn, PPEtn)                                                     |           |
| <b>133</b> | 1015.2 | 1353.4 | 4064.0 | 4063.2 | Ac•Neu5Ac <sub>2</sub> •Hex <sub>3</sub> •Hep <sub>2</sub> •PEtn <sub>1</sub> •KDO <sub>2</sub> •lipid A (PPEtn, P)                                       | <b>B</b>  |
|            | 1045.9 | 1394.7 | 4187.4 | 4186.2 | Ac•Neu5Ac <sub>2</sub> •Hex <sub>3</sub> •Hep <sub>2</sub> •PEtn <sub>1</sub> •KDO <sub>2</sub> •lipid A (PPEtn, PPEtn)                                   |           |
|            | 1066.0 | 1421.6 | 4267.9 | 4266.4 | Ac•Neu5Ac <sub>2</sub> •Hex <sub>3</sub> •HexNAc <sub>1</sub> •Hep <sub>2</sub> •PEtn <sub>1</sub> •KDO <sub>2</sub> •lipid A (PPEtn, P)                  |           |
|            | 1096.5 | 1462.2 | 4389.8 | 4389.4 | Ac•Neu5Ac <sub>2</sub> •Hex <sub>3</sub> •HexNAc <sub>1</sub> •Hep <sub>2</sub> •PEtn <sub>1</sub> •KDO <sub>2</sub> •lipid A (PPEtn, PPEtn)              |           |
| <b>103</b> |        | 1390.9 | 4175.7 | 4175.2 | Neu5Ac <sub>1</sub> •Hex <sub>4</sub> •HexNAc <sub>1</sub> •Hep <sub>2</sub> •P <sub>1</sub> •PEtn <sub>1</sub> •KDO <sub>2</sub> •lipid A (PPEtn, P)     | <b>BE</b> |
|            |        | 1431.8 | 4298.4 | 4298.3 | Neu5Ac <sub>1</sub> •Hex <sub>4</sub> •HexNAc <sub>1</sub> •Hep <sub>2</sub> •P <sub>1</sub> •PEtn <sub>1</sub> •KDO <sub>2</sub> •lipid A (PPEtn, PPEtn) |           |
| <b>62</b>  | 1064.9 | 1420.5 | 4264.1 |        | Unknown, no sialic acid                                                                                                                                   | <b>E</b>  |
|            | 1079.3 | 1439.3 | 4321.1 |        | Unknown, with glycine, no sialic acid                                                                                                                     |           |
|            | 1095.9 | 1461.6 | 4387.7 |        | Unknown, no sialic acid                                                                                                                                   |           |

|                      |        |        |        |        |                                                                                                                                               |          |
|----------------------|--------|--------|--------|--------|-----------------------------------------------------------------------------------------------------------------------------------------------|----------|
| <b>63, 93, 122</b>   | 1063.8 | 1418.6 | 4259.0 | 4257.4 | Neu5Ac <sub>1</sub> •Hex <sub>5</sub> •HexNac <sub>1</sub> •Hep <sub>2</sub> •PEtn <sub>1</sub> •KDO <sub>2</sub> •lipid A (PPEtn, P)         | <b>C</b> |
|                      |        | 1437.3 | 4314.9 | 4314.4 | Gly•Neu5Ac <sub>1</sub> •Hex <sub>5</sub> •HexNac <sub>1</sub> •Hep <sub>2</sub> •PEtn <sub>1</sub> •KDO <sub>2</sub> •lipid A (PPEtn, P)     |          |
|                      | 1094.7 | 1459.1 | 4381.5 | 4380.4 | Neu5Ac <sub>1</sub> •Hex <sub>5</sub> •HexNac <sub>1</sub> •Hep <sub>2</sub> •PEtn <sub>1</sub> •KDO <sub>2</sub> •lipid A (PPEtn, PPEtn)     |          |
|                      | 1108.8 | 1478.6 | 4439.0 | 4437.5 | Gly•Neu5Ac <sub>1</sub> •Hex <sub>5</sub> •HexNac <sub>1</sub> •Hep <sub>2</sub> •PEtn <sub>1</sub> •KDO <sub>2</sub> •lipid A (PPEtn, PPEtn) |          |
| <b>64</b>            | 1023.1 | 1364.1 | 4095.9 | 4095.2 | Neu5Ac <sub>1</sub> •Hex <sub>4</sub> •HexNac <sub>1</sub> •Hep <sub>2</sub> •KDO <sub>2</sub> •lipid A (PPEtn, PPEtn)                        | <b>B</b> |
|                      | 1073.5 | 1432.1 | 4298.7 | 4298.4 | Neu5Ac <sub>1</sub> •Hex <sub>4</sub> •HexNac <sub>2</sub> •Hep <sub>2</sub> •KDO <sub>2</sub> •lipid A (PPEtn, PPEtn)                        |          |
|                      | 1088.1 | 1451.2 | 4356.5 | 4355.5 | Gly•Neu5Ac <sub>1</sub> •Hex <sub>4</sub> •HexNac <sub>2</sub> •Hep <sub>2</sub> •KDO <sub>2</sub> •lipid A (PPEtn, PPEtn)                    |          |
|                      | 1104.5 | 1472.9 | 4421.9 | 4421.6 | Neu5Ac <sub>1</sub> •Hex <sub>4</sub> •HexNac <sub>2</sub> •Hep <sub>2</sub> •PEtn <sub>1</sub> •KDO <sub>2</sub> •lipid A (PPEtn, PPEtn)     |          |
|                      | 1118.7 | 1492.5 | 4479.2 | 4478.6 | Gly•Neu5Ac <sub>1</sub> •Hex <sub>4</sub> •HexNac <sub>2</sub> •Hep <sub>2</sub> •PEtn <sub>1</sub> •KDO <sub>2</sub> •lipid A (PPEtn, PPEtn) |          |
| <b>37</b>            | 1043.1 | 1391.3 | 4176.7 |        | Unknown, no sialic acid                                                                                                                       | <b>E</b> |
|                      | 1074.0 | 1431.9 | 4299.4 |        | Unknown, no sialic acid                                                                                                                       |          |
| <b>44</b>            | 1063.3 | 1418.1 | 4257.3 | 4257.4 | Neu5Ac <sub>1</sub> •Hex <sub>5</sub> •HexNac <sub>1</sub> •Hep <sub>2</sub> •PEtn <sub>1</sub> •KDO <sub>2</sub> •lipid A (PPEtn, P)         | <b>C</b> |
|                      |        | 1437.0 | 4314.0 | 4314.4 | Gly•Neu5Ac <sub>1</sub> •Hex <sub>5</sub> •HexNac <sub>1</sub> •Hep <sub>2</sub> •PEtn <sub>1</sub> •KDO <sub>2</sub> •lipid A (PPEtn, P)     |          |
|                      | 1094.0 | 1459.1 | 4380.3 | 4380.4 | Neu5Ac <sub>1</sub> •Hex <sub>5</sub> •HexNac <sub>1</sub> •Hep <sub>2</sub> •PEtn <sub>1</sub> •KDO <sub>2</sub> •lipid A (PPEtn, PPEtn)     |          |
|                      |        | 1487.0 | 4437.0 | 4437.5 | Gly•Neu5Ac <sub>1</sub> •Hex <sub>5</sub> •HexNac <sub>1</sub> •Hep <sub>2</sub> •PEtn <sub>1</sub> •KDO <sub>2</sub> •lipid A (PPEtn, PPEtn) |          |
| <b>47</b>            | 1085.1 | 1446.9 | 4344.1 |        | Unknown, no sialic acid                                                                                                                       | <b>E</b> |
|                      | 1099.4 | 1465.6 | 4400.7 |        | Unknown, with glycine, no sialic acid                                                                                                         |          |
|                      | 1115.6 | 1487.9 | 4466.6 |        | Unknown, no sialic acid                                                                                                                       |          |
|                      | 1130.4 | 1506.9 | 4524.7 |        | Unknown, with glycine, no sialic acid                                                                                                         |          |
| <b>105, 115, 121</b> | 1026.1 | 1368.4 | 4108.3 |        | Unknown, no sialic acid                                                                                                                       | <b>D</b> |
|                      |        | 1409.4 | 4231.2 |        | Unknown, no sialic acid                                                                                                                       |          |

|    |        |        |        |        |                                                                                                                                                            |    |
|----|--------|--------|--------|--------|------------------------------------------------------------------------------------------------------------------------------------------------------------|----|
| 95 | 1041.2 | 1388.5 | 4168.7 | 4169.3 | Hex <sub>5</sub> •HexNAC <sub>2</sub> •Hep <sub>2</sub> •PEtn <sub>1</sub> •KDO <sub>2</sub> •lipid A ( <i>PP</i> Etn, <i>P</i> )                          | D  |
|    |        | 1407.5 | 4225.5 | 4226.4 | Gly•Hex <sub>5</sub> •HexNAC <sub>2</sub> •Hep <sub>2</sub> •PEtn <sub>1</sub> •KDO <sub>2</sub> •lipid A ( <i>PP</i> Etn, <i>P</i> )                      |    |
|    | 1072.0 | 1429.3 | 4291.5 | 4292.4 | Hex <sub>5</sub> •HexNAC <sub>2</sub> •Hep <sub>2</sub> •PEtn <sub>1</sub> •KDO <sub>2</sub> •lipid A ( <i>PP</i> Etn, <i>PP</i> Etn)                      |    |
|    | 1086.2 | 1448.2 | 4348.2 | 4349.4 | Gly•Hex <sub>5</sub> •HexNAC <sub>2</sub> •Hep <sub>2</sub> •PEtn <sub>1</sub> •KDO <sub>2</sub> •lipid A ( <i>PP</i> Etn, <i>PP</i> Etn)                  |    |
| 96 | 1032.1 | 1377.2 | 4133.5 | 4134.3 | Neu5Ac <sub>1</sub> •Hex <sub>5</sub> •HexNAC <sub>1</sub> •Hep <sub>2</sub> •PEtn <sub>1</sub> •KDO <sub>2</sub> •lipid A ( <i>P</i> , <i>P</i> )         | CD |
|    |        | 1396.3 | 4191.9 | 4191.4 | Gly•Neu5Ac <sub>1</sub> •Hex <sub>5</sub> •HexNAC <sub>1</sub> •Hep <sub>2</sub> •PEtn <sub>1</sub> •KDO <sub>2</sub> •lipid A ( <i>P</i> , <i>P</i> )     |    |
|    | 1073.3 | 1431.2 | 4296.9 | 4296.5 | Neu5Ac <sub>1</sub> •Hex <sub>6</sub> •HexNAC <sub>1</sub> •Hep <sub>2</sub> •PEtn <sub>1</sub> •KDO <sub>2</sub> •lipid A ( <i>P</i> , <i>P</i> )         |    |
|    |        | 1450.3 | 4353.9 | 4353.5 | Gly•Neu5Ac <sub>1</sub> •Hex <sub>6</sub> •HexNAC <sub>1</sub> •Hep <sub>2</sub> •PEtn <sub>1</sub> •KDO <sub>2</sub> •lipid A ( <i>P</i> , <i>P</i> )     |    |
|    | 1103.7 | 1472.1 | 4419.1 | 4419.5 | Neu5Ac <sub>1</sub> •Hex <sub>6</sub> •HexNAC <sub>1</sub> •Hep <sub>2</sub> •PEtn <sub>1</sub> •KDO <sub>2</sub> •lipid A ( <i>PP</i> Etn, <i>P</i> )     |    |
|    |        | 1491.2 | 4476.6 | 4476.6 | Gly•Neu5Ac <sub>1</sub> •Hex <sub>6</sub> •HexNAC <sub>1</sub> •Hep <sub>2</sub> •PEtn <sub>1</sub> •KDO <sub>2</sub> •lipid A ( <i>PP</i> Etn, <i>P</i> ) |    |
|    | 1134.4 | 1513.3 | 4542.3 | 4542.6 | Neu5Ac <sub>1</sub> •Hex <sub>6</sub> •HexNAC <sub>1</sub> •Hep <sub>2</sub> •PEtn <sub>1</sub> •KDO <sub>2</sub> •lipid A ( <i>PP</i> Etn, <i>PP</i> Etn) |    |
| 97 |        | 1226.8 | 3683.4 |        | Unknown, no sialic acid                                                                                                                                    | -  |
|    |        | 1267.8 | 3806.4 |        | Unknown, no sialic acid                                                                                                                                    |    |
|    |        | 1389.3 | 4170.9 |        | Unknown, no sialic acid                                                                                                                                    |    |
|    |        | 1443.4 | 4333.2 |        | Unknown, no sialic acid                                                                                                                                    |    |
|    |        | 1497.2 | 4494.6 |        | Unknown, no sialic acid                                                                                                                                    |    |
|    |        | 1551.1 | 4656.3 |        | Unknown, no sialic acid                                                                                                                                    |    |
|    |        | 1570.3 | 4713.9 |        | Unknown, with glycine, no sialic acid                                                                                                                      |    |
|    |        | 1592.0 | 4779.0 |        | Unknown, no sialic acid                                                                                                                                    |    |
| 98 | 1063.5 | 1418.2 | 4257.8 | 4257.4 | Neu5Ac <sub>1</sub> •Hex <sub>5</sub> •HexNAC <sub>1</sub> •Hep <sub>2</sub> •PEtn <sub>1</sub> •KDO <sub>2</sub> •lipid A ( <i>PP</i> Etn, <i>P</i> )     | CD |

|            |        |        |        |        |                                                                                                                                               |          |
|------------|--------|--------|--------|--------|-----------------------------------------------------------------------------------------------------------------------------------------------|----------|
|            |        | 1437.2 | 4314.6 | 4314.4 | Gly•Neu5Ac <sub>1</sub> •Hex <sub>5</sub> •HexNAc <sub>1</sub> •Hep <sub>2</sub> •PEtn <sub>1</sub> •KDO <sub>2</sub> •lipid A (PPEtn, P)     |          |
|            | 1094.4 | 1459.3 | 4381.3 | 4380.4 | Neu5Ac <sub>1</sub> •Hex <sub>5</sub> •HexNAc <sub>1</sub> •Hep <sub>2</sub> •PEtn <sub>1</sub> •KDO <sub>2</sub> •lipid A (PPEtn, PPEtn)     |          |
|            | 1103.9 | 1472.2 | 4419.6 | 4419.5 | Neu5Ac <sub>1</sub> •Hex <sub>6</sub> •HexNAc <sub>1</sub> •Hep <sub>2</sub> •PEtn <sub>1</sub> •KDO <sub>2</sub> •lipid A (PPEtn, P)         |          |
|            | 1134.6 | 1513.2 | 4542.5 | 4542.6 | Neu5Ac <sub>1</sub> •Hex <sub>6</sub> •HexNAc <sub>1</sub> •Hep <sub>2</sub> •PEtn <sub>1</sub> •KDO <sub>2</sub> •lipid A (PPEtn, PPEtn)     |          |
|            |        | 1532.2 | 4599.6 | 4599.6 | Gly•Neu5Ac <sub>1</sub> •Hex <sub>6</sub> •HexNAc <sub>1</sub> •Hep <sub>2</sub> •PEtn <sub>1</sub> •KDO <sub>2</sub> •lipid A (PPEtn, PPEtn) |          |
| <b>107</b> | 959.9  | 1280.2 | 3843.6 | 3842.7 | Hex <sub>5</sub> •HexNAc <sub>1</sub> •Hep <sub>2</sub> •KDO <sub>2</sub> •lipid A (PPEtn, P)                                                 | <b>D</b> |
|            |        | 1299.3 | 3900.9 | 3900.1 | Gly•Hex <sub>5</sub> •HexNAc <sub>1</sub> •Hep <sub>2</sub> •KDO <sub>2</sub> •lipid A (PPEtn, P)                                             |          |
|            | 991.0  | 1321.2 | 3967.3 | 3966.1 | Hex <sub>5</sub> •HexNAc <sub>1</sub> •Hep <sub>2</sub> •KDO <sub>2</sub> •lipid A (PPEtn, PPEtn)                                             |          |
|            | 1005.1 | 1340.2 | 4024.0 | 4023.2 | Gly•Hex <sub>5</sub> •HexNAc <sub>1</sub> •Hep <sub>2</sub> •KDO <sub>2</sub> •lipid A (PPEtn, PPEtn)                                         |          |
|            | 1051.3 | 1401.9 | 4208.9 | 4208.4 | Hex <sub>6</sub> •HexNAc <sub>2</sub> •Hep <sub>2</sub> •KDO <sub>2</sub> •lipid A (PPEtn, P)                                                 |          |
|            |        | 1420.9 | 4265.7 | 4265.4 | Gly•Hex <sub>6</sub> •HexNAc <sub>2</sub> •Hep <sub>2</sub> •KDO <sub>2</sub> •lipid A (PPEtn, P)                                             |          |
|            | 1082.3 | 1443.0 | 4332.6 | 4331.1 | Hex <sub>6</sub> •HexNAc <sub>2</sub> •Hep <sub>2</sub> •KDO <sub>2</sub> •lipid A (PPEtn, PPEtn)                                             |          |
|            | 1096.4 | 1462.0 | 4389.3 | 4388.1 | Gly•Hex <sub>6</sub> •HexNAc <sub>2</sub> •Hep <sub>2</sub> •KDO <sub>2</sub> •lipid A (PPEtn, PPEtn)                                         |          |
| <b>114</b> |        | 1428.5 | 4288.5 | 4288.4 | Hex <sub>6</sub> •HexNAc <sub>2</sub> •Hep <sub>2</sub> •P <sub>1</sub> •KDO <sub>2</sub> •lipid A (PPEtn, P)                                 | <b>D</b> |
|            |        | 1469.2 | 4410.6 | 4411.4 | Hex <sub>6</sub> •HexNAc <sub>2</sub> •Hep <sub>2</sub> •P <sub>1</sub> •KDO <sub>2</sub> •lipid A (PPEtn, PPEtn)                             |          |
| <b>116</b> | 1013.0 | 1350.6 | 4055.4 | 4054.2 | Neu5Ac <sub>1</sub> •Hex <sub>5</sub> •Hep <sub>2</sub> •PEtn <sub>1</sub> •KDO <sub>2</sub> •lipid A (PPEtn, P)                              | <b>C</b> |
|            | 1044.1 | 1391.6 | 4179.1 | 4177.2 | Neu5Ac <sub>1</sub> •Hex <sub>5</sub> •Hep <sub>2</sub> •PEtn <sub>1</sub> •KDO <sub>2</sub> •lipid A (PPEtn, PPEtn)                          |          |
| <b>128</b> |        | 1145.4 | 3439.2 | 3438.6 | Hex <sub>3</sub> •Hep <sub>2</sub> •PEtn <sub>1</sub> •KDO <sub>2</sub> •lipid A (PPEtn, P)                                                   | <b>C</b> |
|            |        | 1186.5 | 3562.5 | 3561.7 | Hex <sub>3</sub> •Hep <sub>2</sub> •PEtn <sub>1</sub> •KDO <sub>2</sub> •lipid A (PPEtn, PPEtn)                                               |          |
|            |        | 1199.1 | 3600.3 | 3600.8 | Hex <sub>4</sub> •Hep <sub>2</sub> •PEtn <sub>1</sub> •KDO <sub>2</sub> •lipid A (PPEtn, P)                                                   |          |
|            |        | 1240.2 | 3723.6 | 3723.8 | Hex <sub>4</sub> •Hep <sub>2</sub> •PEtn <sub>1</sub> •KDO <sub>2</sub> •lipid A (PPEtn, PPEtn)                                               |          |



|                     |        |        |        |                                                                                                                                                           |                                                                                                                                                       |          |
|---------------------|--------|--------|--------|-----------------------------------------------------------------------------------------------------------------------------------------------------------|-------------------------------------------------------------------------------------------------------------------------------------------------------|----------|
| <b>131</b>          |        | 1428.9 | 4289.7 | 4288.4                                                                                                                                                    | Hex <sub>6</sub> •HexNAC <sub>2</sub> •Hep <sub>2</sub> •P <sub>1</sub> •KDO <sub>2</sub> •lipid A ( <i>PEtn, P</i> )                                 | <b>A</b> |
|                     |        | 1469.7 | 4412.1 | 4411.4                                                                                                                                                    | Hex <sub>6</sub> •HexNAC <sub>1</sub> •Hep <sub>2</sub> •P <sub>1</sub> •KDO <sub>2</sub> •lipid A ( <i>PEtn, PPEtn</i> )                             |          |
| <b>GB17, 14, 51</b> | 1023.1 | 1364.0 | 4095.7 | 4095.2                                                                                                                                                    | Neu5Ac <sub>1</sub> •Hex <sub>4</sub> •HexNAC <sub>1</sub> •Hep <sub>2</sub> •PEtn <sub>1</sub> •KDO <sub>2</sub> •lipid A ( <i>PPEtn, P</i> )        | <b>B</b> |
|                     | 1053.6 | 1405.3 | 4218.7 | 4218.3                                                                                                                                                    | Neu5Ac <sub>1</sub> •Hex <sub>4</sub> •HexNAC <sub>1</sub> •Hep <sub>2</sub> •PEtn <sub>1</sub> •KDO <sub>2</sub> •lipid A ( <i>PPEtn, PPEtn</i> )    |          |
|                     |        | 1461.6 | 4387.8 | 4386.5                                                                                                                                                    | Neu5Ac <sub>2</sub> •Hex <sub>4</sub> •HexNAC <sub>1</sub> •Hep <sub>2</sub> •PEtn <sub>1</sub> •KDO <sub>2</sub> •lipid A ( <i>PPEtn, P</i> )        |          |
|                     | 1106.3 | 1475.4 | 4429.2 | 4428.5                                                                                                                                                    | Ac•Neu5Ac <sub>2</sub> •Hex <sub>4</sub> •HexNAC <sub>1</sub> •Hep <sub>2</sub> •PEtn <sub>1</sub> •KDO <sub>2</sub> •lipid A ( <i>PPEtn, P</i> )     |          |
|                     |        | 1494.3 | 4485.9 | 4485.6                                                                                                                                                    | Gly•Ac•Neu5Ac <sub>2</sub> •Hex <sub>4</sub> •HexNAC <sub>1</sub> •Hep <sub>2</sub> •PEtn <sub>1</sub> •KDO <sub>2</sub> •lipid A ( <i>PPEtn, P</i> ) |          |
|                     |        | 1502.8 | 4511.4 | 4509.5                                                                                                                                                    | Neu5Ac <sub>2</sub> •Hex <sub>4</sub> •HexNAC <sub>1</sub> •Hep <sub>2</sub> •PEtn <sub>1</sub> •KDO <sub>2</sub> •lipid A ( <i>PPEtn, PPEtn</i> )    |          |
|                     | 1136.9 | 1516.1 | 4551.5 | 4551.6                                                                                                                                                    | Ac•Neu5Ac <sub>2</sub> •Hex <sub>4</sub> •HexNAC <sub>1</sub> •Hep <sub>2</sub> •PEtn <sub>1</sub> •KDO <sub>2</sub> •lipid A ( <i>PPEtn, PPEtn</i> ) |          |
|                     | 1535.0 | 4608.0 | 4608.6 | Gly•Ac•Neu5Ac <sub>2</sub> •Hex <sub>4</sub> •HexNAC <sub>1</sub> •Hep <sub>2</sub> •PEtn <sub>1</sub> •KDO <sub>2</sub> •lipid A ( <i>PPEtn, PPEtn</i> ) |                                                                                                                                                       |          |

\* Isotope-averaged mass units were used for calculation of molecular mass values based on proposed compositions as follows: Hex, 162.14; HexNAC, 203.19; Hep, 192.17; KDO, 220.18; *P*, 79.98; *PEtn*, 123.05; Neu5Ac, 291.26; Gly, 57.05; Ac, 42.03; HexN, 161.07; HexN3N, 160.18; C14:0(3-OH), 226.36; C14:0, 210.41; C16:0, 238.41.
